# Supplementary material for: Singly-bonded fullerene dimers: neutral (C60Cl5)2 and cationic (C70)22+?
Source: Royal Society of Chemistry journal article supplement (doi:10.1039/b702665j), 2007-01-01
Supplement: b702665j.pdf [file b702665j.pdf]

Supplementary Information to the paper DOI: 10.1039/b702665j

S. I. Troyanov, E. Kemnitz

**Singly bonded fullerene dimers, neutral (C<sub>60</sub>Cl<sub>5</sub>)<sub>2</sub> and cationic (C<sub>70</sub>)<sub>2</sub><sup>2+</sup>**

IR spectrum of the phase (C<sub>60</sub>Cl<sub>5</sub>)<sub>2</sub> recorded on a Perkin Elmer2000 FT-IR spectrometer  
(KBr pellet)

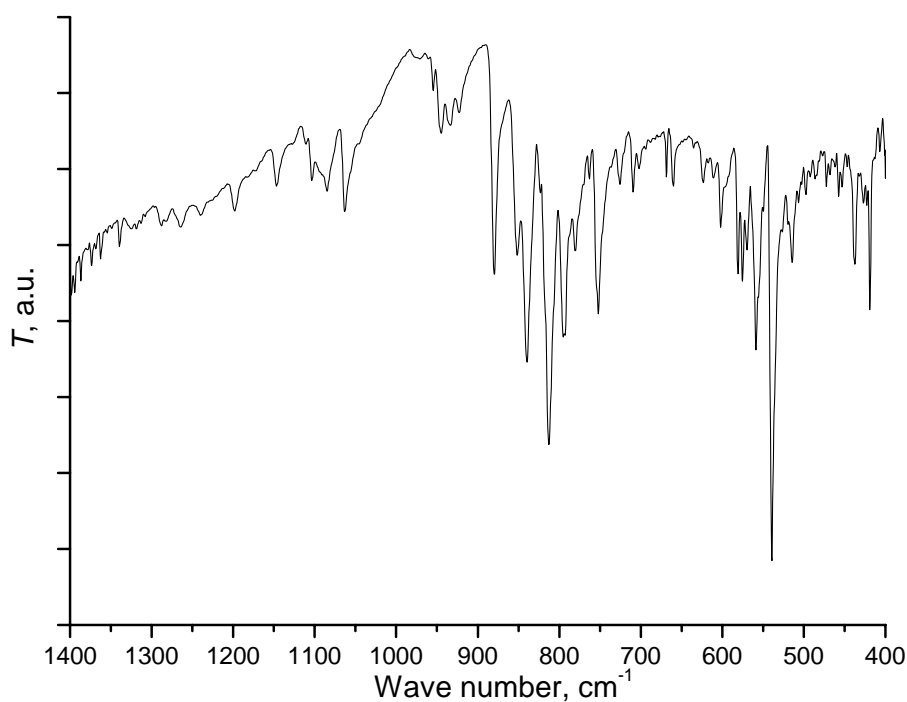

The main bands are observed at 437, 514, 539, 558, 569, 575, 581, 602, 623, 660, 709, 752, 780, 794, 813, 840, 852, 880, and 1063 cm<sup>-1</sup>. For comparison purpose, the IR spectra of C<sub>60</sub>Cl<sub>6</sub> can be found in refs. 1 and 2.

1. P. R. Birkett, A. G. Avent, A. D. Darwish, H. W. Kroto, R. Taylor and D. R. M. Walton, *Chem. Commun.*, 1993, 1230.
2. I. V. Kuvychko, A. V. Streletskii, A. A. Popov, S. G. Kotsiris, T. Drewello, S. H. Strauss and O. V. Boltalina, *Chem.-Eur. J.*, 2005, **11**, 5426.
